# Supplementary material for: A Systematic Review of Treatment Outcome Predictors in Deep Brain Stimulation for Refractory Obsessive-Compulsive Disorder
Source: MDPI journal article supplement (doi:10.3390/brainsci12070936), 2022-07-17
Supplement: s1 [file s1]

|                                                                                                                                                                                                                             |      |      |      |      |      |      |      |      |      |      |      |      |      |      |      |      |      |
|-----------------------------------------------------------------------------------------------------------------------------------------------------------------------------------------------------------------------------|------|------|------|------|------|------|------|------|------|------|------|------|------|------|------|------|------|
| blinded to the participants' exposures/interventions ?                                                                                                                                                                      |      |      |      |      |      |      |      |      |      |      |      |      |      |      |      |      |      |
| 9. Was the loss to follow-up after baseline 20% or less? Were those lost to follow-up accounted for in the analysis?                                                                                                        | No   | No   | No   | Yes  | No   | Yes  | Yes  | Yes  | Yes  | Yes  | Yes  |
| 10. Did the statistical methods examine changes in outcome measures from before to after the intervention? Were statistical tests carried out that provided p values for the pre-to-post changes?                           | Yes  |
| 11. Were outcome measures of interest taken multiple times before the intervention and multiple times after the intervention (i.e., did they use an interrupted time-series design)?                                        | Yes  | Yes  | Yes  | No   | Yes  | Yes  | No   | No   | No   | No   | No   | Yes  | No   | No   | No   | No   | Yes  |
| 12. If the intervention was conducted at a group level (e.g., a whole hospital, a community, etc.) did the statistical analysis take into account the use of individual-level data to determine effects at the group level? | NA   |
| Rating                                                                                                                                                                                                                      | Good | Fair | Fair | Fair | Good | Good | Fair | Fair | Good | Fair | Poor | Fair | Fair | Fair | Fair | Fair | Good |
